# Supplementary material for: Phosphorylation of adducin-1 by cyclin-dependent kinase 5 is important for epidermal growth factor-induced cell migration
Source: PubMed Central journal article supplement (PMC6757057; doi:10.1038/s41598-019-50275-0), 2019-09-23

Supplementary Information

**Phosphorylation of adducin-1 by cyclin-dependent kinase 5 is important for epidermal growth factor-induced cell migration**

Chia-Yi Su, Ruei-Liang Yan, Wen-Hsin Hsu, Ching-Tung Chu, Hsuan-Chia Chang,  
Chien-Chen Lai, Hui-Ping Hsu, and Hong-Chen Chen

\*Corresponding author. Email: hcchen1029@ym.edu.tw

**Supplementary Table S1.** Predicted ADD1 phosphorylation sites for Cdk5.

| Software              | ADD1 |
|-----------------------|------|
| Scansite <sup>1</sup> | S431 |
|                       | S600 |
|                       | T724 |
| GPS <sup>2</sup>      | S431 |
|                       | S600 |
|                       | T724 |

**Supplementary Table S2.** Identification of ADD1 phosphorylation sites by mass spectrometry analysis.

| ADD1 domain | Cdk5 <sup>a</sup> |      |
|-------------|-------------------|------|
|             | -                 | +    |
| head        | S12               | S12  |
|             |                   |      |
| neck        | S355              | S355 |
|             | S358              | S358 |
|             |                   | S431 |
|             | S465              | S465 |
| tail        |                   | S586 |
|             |                   | S600 |
|             |                   | T724 |
|             | S726              | S726 |

a. HEK293 cells were transiently transfected with (+) or without (-) Cdk5. Endogenous ADD1 was immunoprecipitated with anti-ADD1 antibody and the phosphorylation sites of ADD1 were identified by mass spectrometry.

## References

1. Obenaur, J.C., Cantley, L.C. & Yaffe, M.B. Scansite 2.0: proteome-wide prediction of cell signaling interactions using short sequence motifs. *Nucleic Acids Res.* **31**, 3635-3641; <http://scansite.mit.edu> (2003).
2. Xue, Y. *et al.* GPS 2.0, a tool to predict kinase-specific phosphorylation sites in hierarchy. *Mol. Cell Proteomics* **7**, 1598-1608; <https://omictools.com/gps-2-tool> (2008).

# Raw data

## Supple. Fig. 1(a)

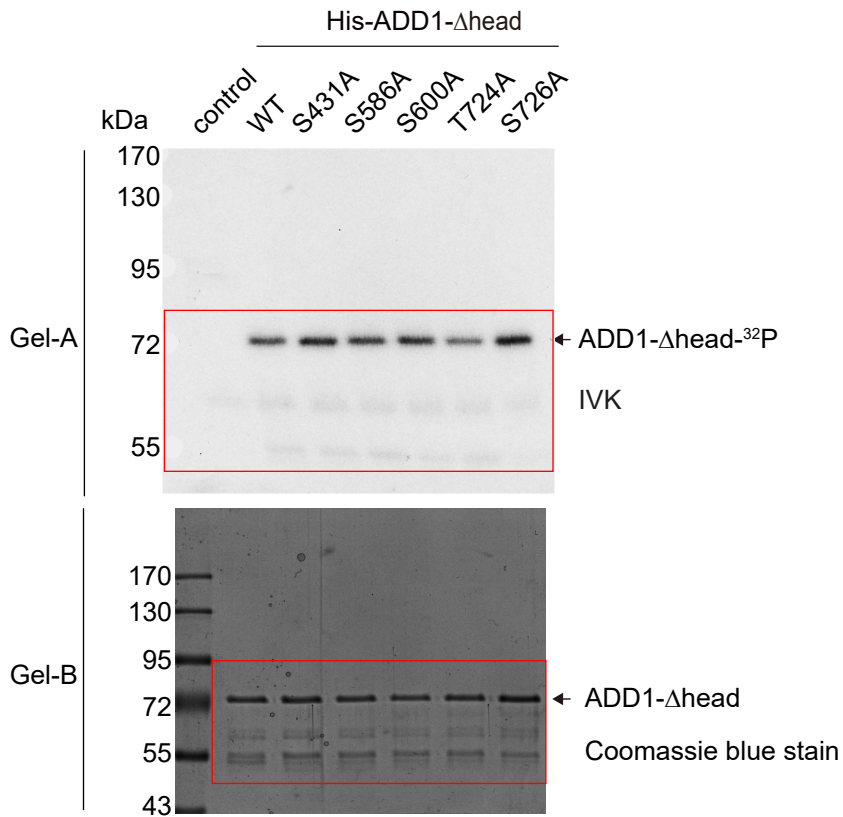

## Supple. Fig. 1(b)

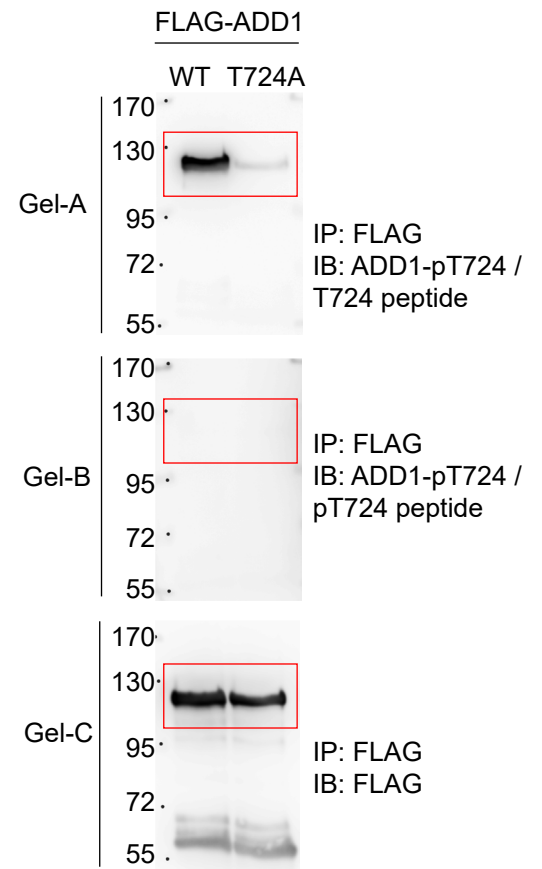

Supple. Fig. 1(c)

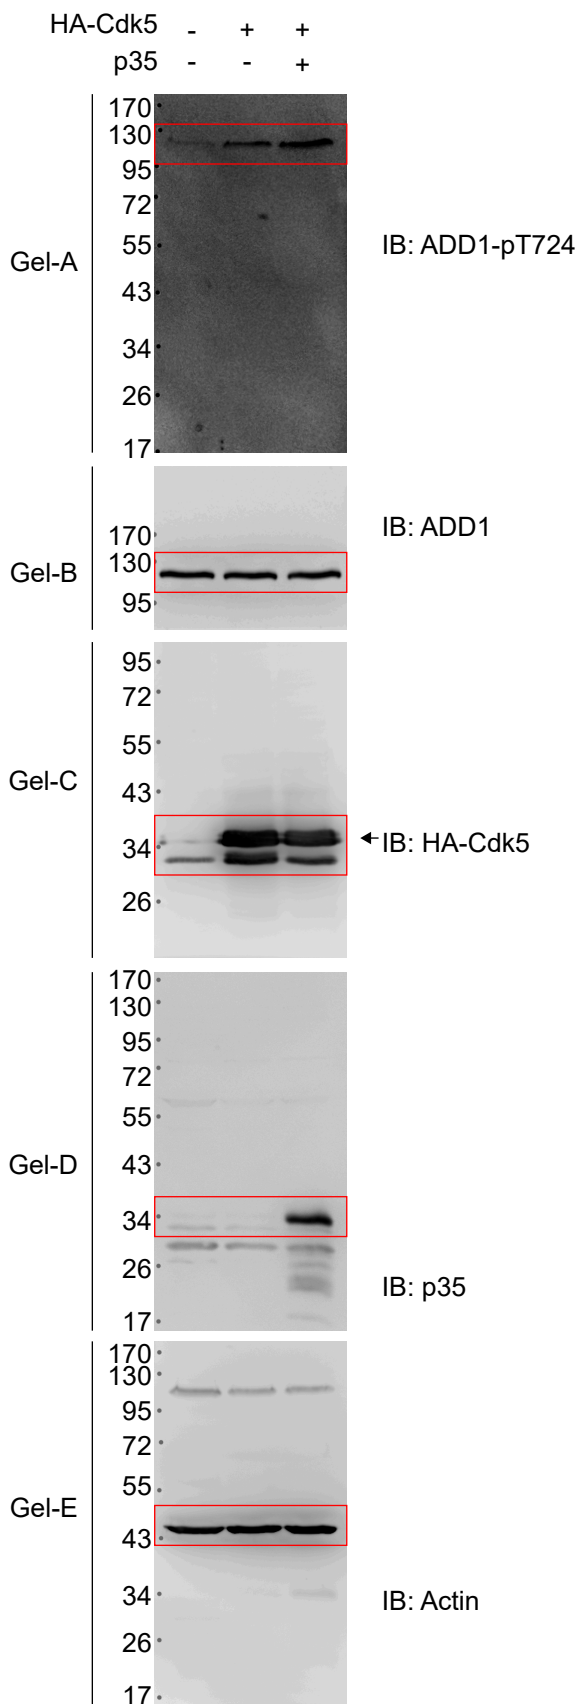

Supple. Fig. 1(d)

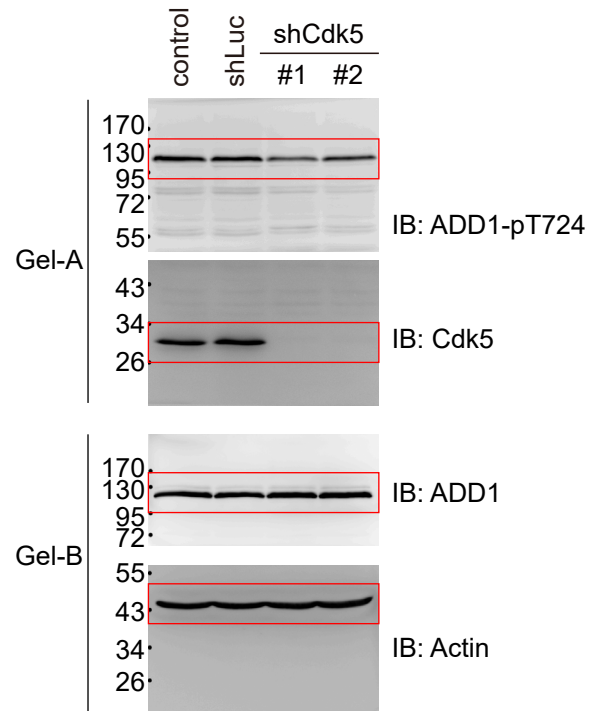

Supple. Fig. 2(a)

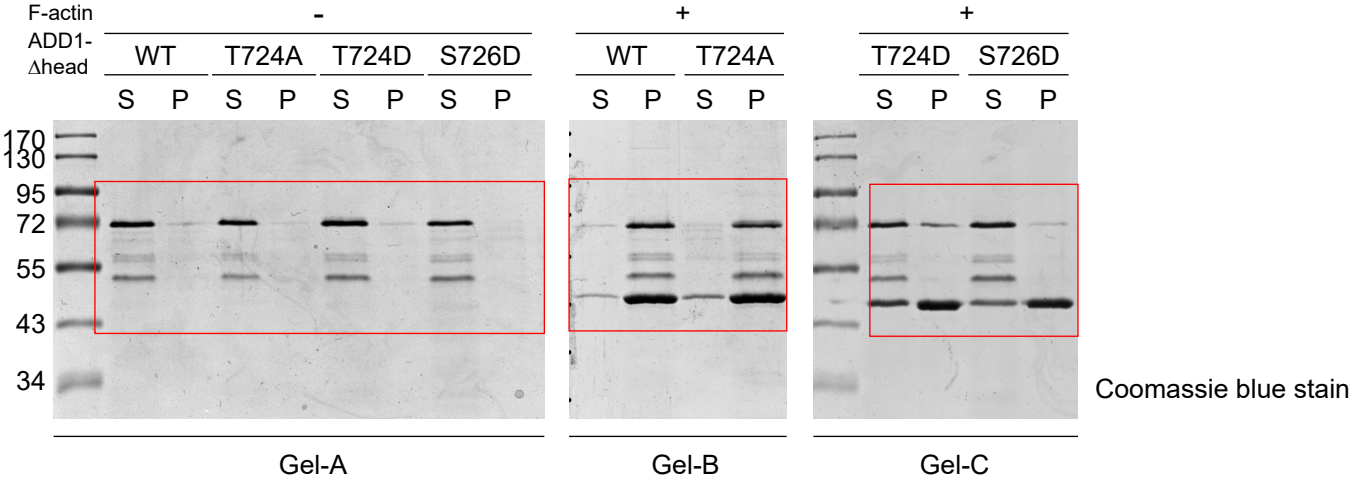

Supple. Fig. 4(a)

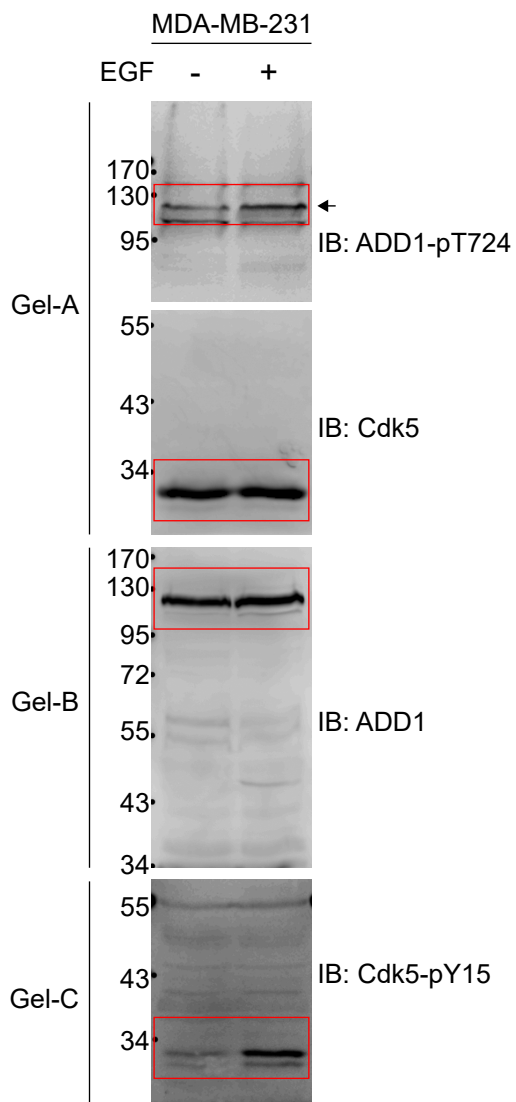

Supple. Fig. 4(b)

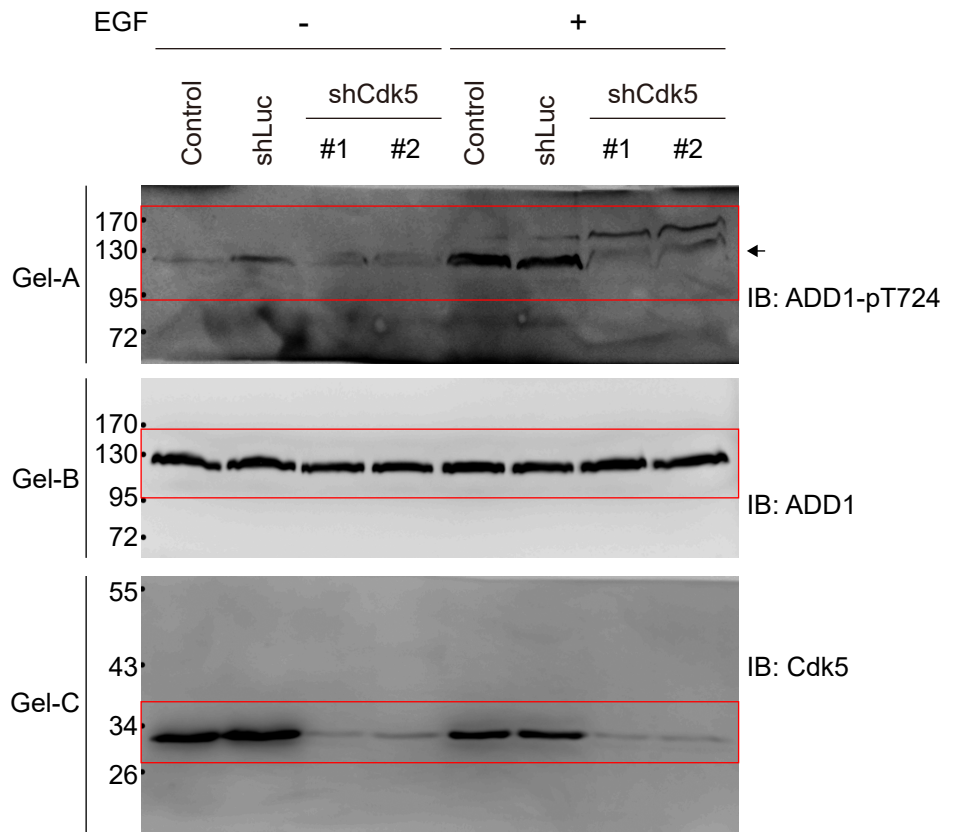

Supple. Fig. 5(a)

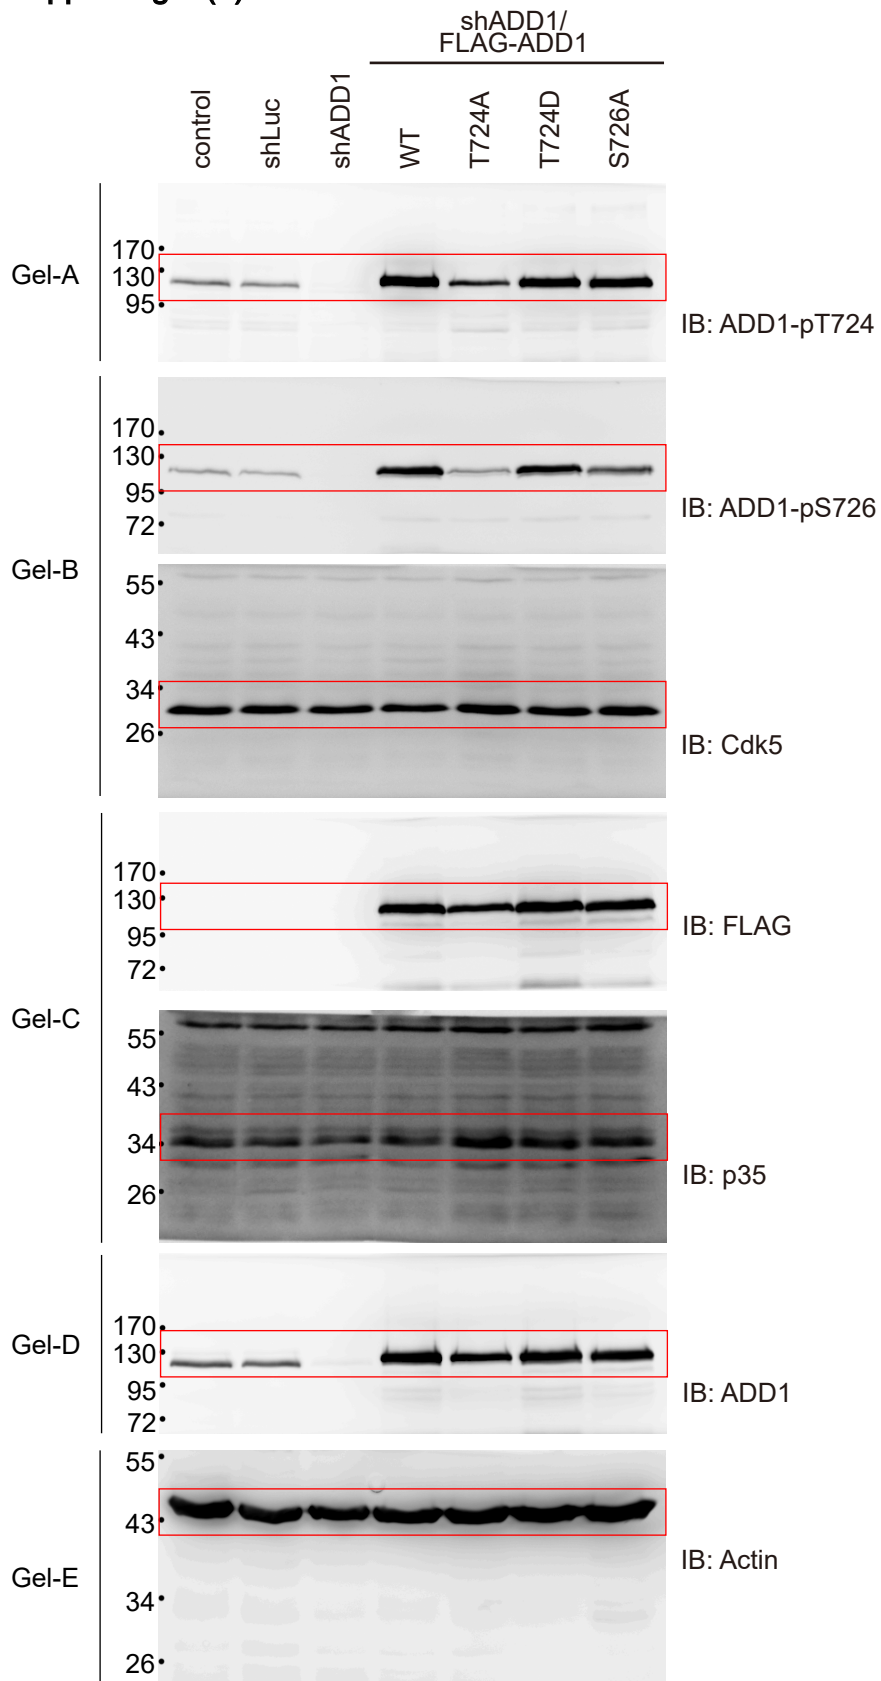



**Supple. Fig. 7(a)**

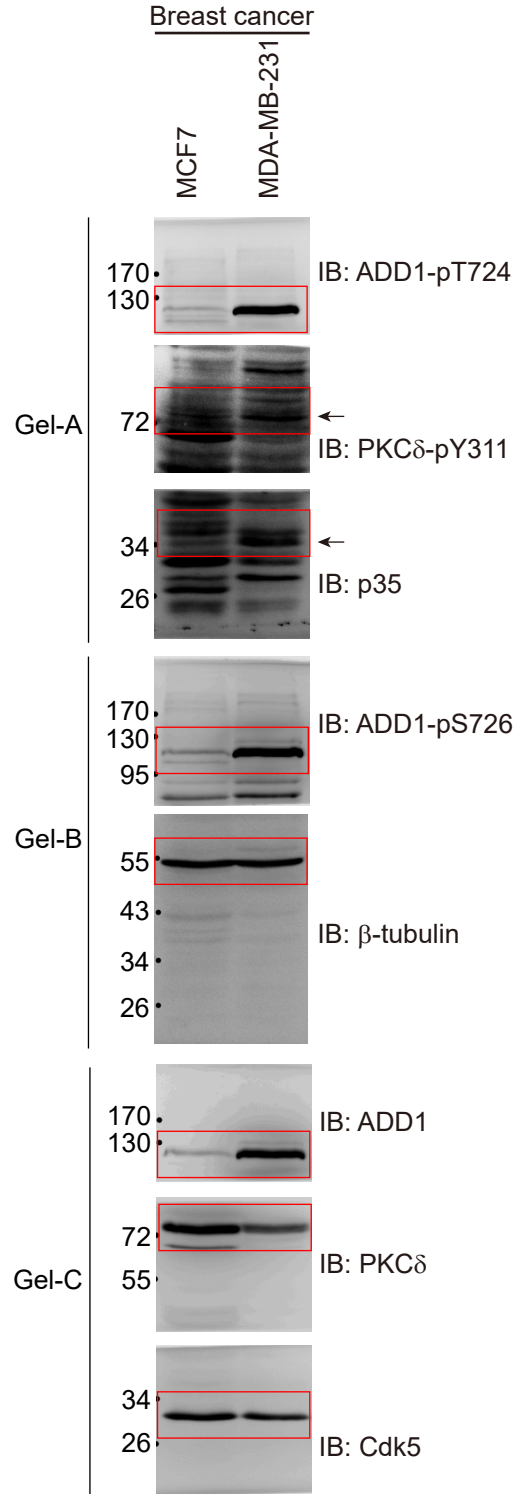

**Supple. Fig. 7(b)**

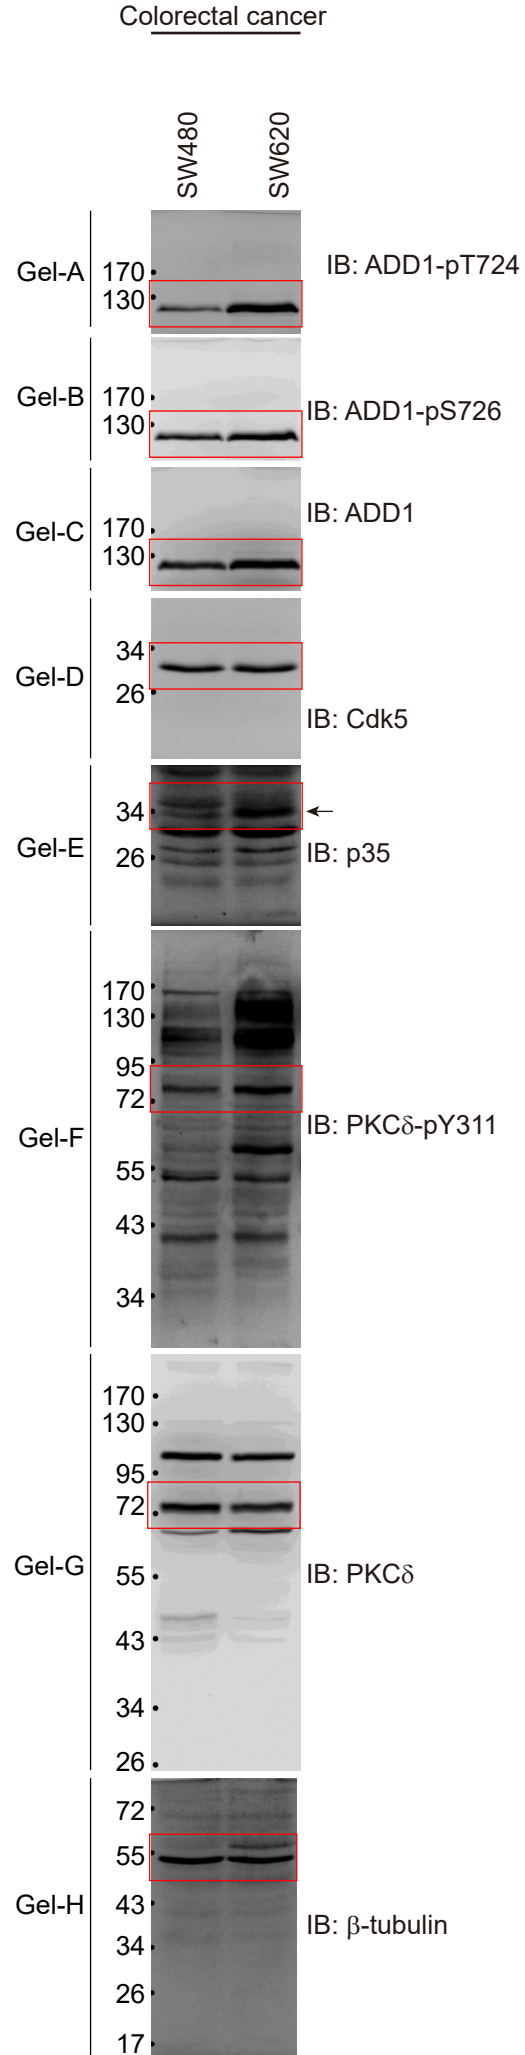

Supplement: 41598_2019_50275_MOESM1_ESM.pdf [file 41598_2019_50275_MOESM1_ESM.pdf]
